# Supplementary material for: Genetic Structuring of One of the Main Vectors of Sylvatic Yellow Fever: Haemagogus (Conopostegus) leucocelaenus (Diptera: Culicidae)
Source: MDPI journal article supplement (doi:10.3390/genes14091671), 2023-08-24
Supplement: s1 [file s1]

## Supplementary Materials

**Table S1.** Locations and numbers of adult specimens and immature forms of *Hg. leucocelaenus* collected to analyze single nucleotide polymorphisms (SNPs).

| Date       | Location                                              | Description                                                            | Gender | Form     |   |       |
|------------|-------------------------------------------------------|------------------------------------------------------------------------|--------|----------|---|-------|
| 12/16/2020 | Balsamo<br>(Sítio Madalena)                           | Private rural property                                                 | F      | Adult    |   |       |
|            |                                                       |                                                                        | F      | Adult    |   |       |
|            |                                                       |                                                                        | F      | Adult    |   |       |
|            |                                                       |                                                                        | F      | Adult    |   |       |
|            |                                                       |                                                                        | F      | Adult    |   |       |
|            |                                                       |                                                                        | F      | Adult    |   |       |
|            |                                                       |                                                                        | F      | Adult    |   |       |
| 11/3/2019  | Caraguatatuba<br>(Benfica district)                   | Private rural property                                                 | F      | Adult    |   |       |
|            |                                                       |                                                                        | F      | Adult    |   |       |
|            |                                                       |                                                                        | F      | Adult    |   |       |
|            |                                                       |                                                                        | F      | Adult    |   |       |
| 11/2/2019  | Caraguatatuba<br>(Sítio Marisquinho)                  | Private rural property                                                 | M      | Immature |   |       |
|            |                                                       |                                                                        | F      | Adult    |   |       |
|            |                                                       |                                                                        | F      | Adult    |   |       |
|            |                                                       |                                                                        | F      | Adult    |   |       |
| 12/4/2019  | Igaratá<br>(Pontal das Garças Gated<br>Community)     | Private property                                                       | F      | Adult    |   |       |
|            |                                                       |                                                                        | F      | Adult    |   |       |
| 11/26/2018 | Mairiporã<br>(Cantareira State Park)                  | Pinheirinho trail                                                      | F      | Immature |   |       |
| F          |                                                       |                                                                        | Adult  |          |   |       |
| F          |                                                       |                                                                        | Adult  |          |   |       |
| F          |                                                       |                                                                        | Adult  |          |   |       |
| F          |                                                       |                                                                        | Adult  |          |   |       |
| F          |                                                       |                                                                        | Adult  |          |   |       |
| 1/27/2020  |                                                       |                                                                        | F      | Adult    |   |       |
| 1/24/2019  | Miracatu<br>(Legado das Águas” Ecological<br>Reserve) | Suspended trail                                                        | M      | Immature |   |       |
|            |                                                       |                                                                        | M      | Immature |   |       |
|            |                                                       |                                                                        | M      | Immature |   |       |
|            |                                                       |                                                                        | M      | Immature |   |       |
|            |                                                       |                                                                        | F      | Immature |   |       |
|            |                                                       |                                                                        | *      | Immature |   |       |
|            |                                                       |                                                                        | *      | Immature |   |       |
|            |                                                       |                                                                        | *      | Immature |   |       |
| 12/10/2019 | Pindamonhangaba<br>(Trabiju Municipal Park)           | “Water tank” trail                                                     | F      | Adult    |   |       |
|            |                                                       |                                                                        | F      | Adult    |   |       |
|            |                                                       |                                                                        | F      | Adult    |   |       |
|            |                                                       |                                                                        | F      | Adult    |   |       |
| F          |                                                       |                                                                        | Adult  |          |   |       |
| F          |                                                       |                                                                        | Adult  |          |   |       |
| F          |                                                       |                                                                        | Adult  |          |   |       |
| F          |                                                       |                                                                        | Adult  |          |   |       |
| 12/11/2019 |                                                       |                                                                        |        |          | F | Adult |
|            |                                                       |                                                                        |        |          | F | Adult |
|            |                                                       |                                                                        | F      | Adult    |   |       |
| 12/15/2020 | Rio Preto                                             | Vegetation fragment south of<br>the dirt road cutting this<br>fragment | F      | Adult    |   |       |
|            |                                                       |                                                                        | F      | Adult    |   |       |
|            |                                                       |                                                                        | F      | Adult    |   |       |
|            |                                                       |                                                                        | F      | Adult    |   |       |
|            |                                                       |                                                                        | F      | Adult    |   |       |

|            |                                      |                                                                        |   |          |
|------------|--------------------------------------|------------------------------------------------------------------------|---|----------|
|            | (Macacos Woods)                      |                                                                        | F | Adult    |
|            |                                      |                                                                        | F | Adult    |
| 12/18/2020 | Rio Preto<br>(Macacos Woods)         | Vegetation fragment north of<br>the dirt road cutting this<br>fragment | F | Adult    |
|            |                                      |                                                                        | F | Adult    |
| 11/26/2018 |                                      |                                                                        | F | Immature |
|            |                                      |                                                                        | M | Immature |
|            |                                      |                                                                        | F | Adult    |
| 1/15/2019  | São Paulo<br>(Cantareira State Park) | Bica trail                                                             | F | Adult    |
|            |                                      |                                                                        | F | Adult    |
| 9/5/2019   |                                      |                                                                        | M | Adult    |
|            |                                      |                                                                        | M | Adult    |
| 9/26/2019  |                                      |                                                                        | F | Immature |
|            |                                      |                                                                        | M | Immature |
| 9/5/2019   |                                      |                                                                        | F | Immature |
|            |                                      |                                                                        | M | Immature |
| 9/26/2019  | São Paulo<br>(Cantareira State Park) | Administration sector                                                  | M | Immature |
|            |                                      |                                                                        | F | Immature |
| 12/18/2019 |                                      |                                                                        | F | Adult    |
|            |                                      |                                                                        | F | Adult    |
|            |                                      |                                                                        | F | Adult    |
| 1/15/2020  |                                      |                                                                        | M | Immature |
|            |                                      |                                                                        | F | Immature |
|            |                                      |                                                                        | M | Immature |

\*Immature forms that did not complete the developmental life cycle

**Table S2.** Indices of mitochondrial DNA diversity among populations (percentage of missing data tolerated < 25%)

|                      | SP | MA | IG | RP | CA | BA | PI | MI | Mean  | SD    |
|----------------------|----|----|----|----|----|----|----|----|-------|-------|
| Number of haplotypes | 26 | 7  | 2  | 23 | 8  | 7  | 10 | 7  | 11.25 | 8.515 |

| Nucleotide composition                                                                                                                                        |     |         |         |       |         |         |         |         |       |                 |
|---------------------------------------------------------------------------------------------------------------------------------------------------------------|-----|---------|---------|-------|---------|---------|---------|---------|-------|-----------------|
| C(%)                                                                                                                                                          |     | 30.97   | 28.4    | 28.57 | 28.71   | 30.35   | 30.79   | 31.14   | 32.48 |                 |
| T(%)                                                                                                                                                          |     | 29.1    | 29.14   | 31.75 | 30.07   | 30.1    | 29.48   | 28.94   | 25.91 |                 |
| A(%)                                                                                                                                                          |     | 26.05   | 26.42   | 24.6  | 21.65   | 23.38   | 20.96   | 24.29   | 30.66 |                 |
| G(%)                                                                                                                                                          |     | 13.88   | 16.05   | 15.08 | 19.57   | 16.17   | 18.78   | 15.63   | 10.95 |                 |
|                                                                                                                                                               |     |         |         |       |         |         |         |         |       |                 |
| Number of loci                                                                                                                                                |     | 115     | 115     | 115   | 115     | 115     | 115     | 115     | 115   | 0               |
| Number of loci used                                                                                                                                           |     | 8       | 14      | 40    | 35      | 8       | 31      | 48      | 3     | 23.375 17.121   |
| Number of polymorphic loci                                                                                                                                    |     | 5       | 6       | 2     | 24      | 7       | 17      | 31      | 0     | 11.5 11.225     |
| Number of gene copies                                                                                                                                         | Mea | 21      | 6.333   | 2     | 19.792  | 7.143   | 6.588   | 9.032   | 0     |                 |
|                                                                                                                                                               | SD  | 0.707   | 0.516   | 0     | 1.503   | 0.378   | 0.507   | 0.706   | 0     |                 |
| Number of alleles                                                                                                                                             | Mea | 2       | 2       | 2     | 2       | 2       | 2       | 2       | 0     |                 |
|                                                                                                                                                               | SD  | 0       | 0       | 0     | 0       | 0       | 0       | 0       | 0     |                 |
| Expected heterozygosity                                                                                                                                       | Mea | 0.17538 | 0.35079 | 1     | 0.35862 | 0.39456 | 0.40168 | 0.38292 | 0     |                 |
|                                                                                                                                                               | SD  | 0.09365 | 0.09242 | 0     | 0.15464 | 0.13941 | 0.11801 | 0.12529 | 0     |                 |
| Number of transitions                                                                                                                                         |     | 5       | 6       | 1     | 24      | 7       | 17      | 31      | 0     | 11.375 11.351   |
| Number of transversions                                                                                                                                       |     | 0       | 0       | 1     | 0       | 0       | 0       | 0       | 0     | 0.125 0.354     |
| Number of substitutions                                                                                                                                       |     | 5       | 6       | 2     | 24      | 7       | 17      | 31      | 0     | 11.5 11.225     |
| Number of indels                                                                                                                                              |     | 0       | 0       | 0     | 0       | 0       | 0       | 0       | 0     | 0 0             |
| Number of private substitutions                                                                                                                               |     | 0       | 0       | 0     | 1       | 0       | 0       | 1       | 0     | 0.25 0.463      |
|                                                                                                                                                               |     |         |         |       |         |         |         |         |       |                 |
| Theta S                                                                                                                                                       |     | 1.31029 | 2.44898 | 2     | 6.50263 | 2.69972 | 6.93878 | 10.9581 | 0     | 4.10731 3.67526 |
|                                                                                                                                                               |     |         |         |       |         |         |         |         |       |                 |
| SD Theta S                                                                                                                                                    |     | 0.69266 | 1.41218 | 1.732 | 2.45405 | 1.47924 | 3.44244 | 4.75643 | 0     | 1.99613 1.52513 |
| Theta                                                                                                                                                         |     | 0.56615 | 1.66667 | 2     | 6.26087 | 2.21429 | 6.04762 | 9.53333 | 0     | 3.53612 3.35144 |
| SD Theta                                                                                                                                                      |     | 0.53016 | 1.26802 | 2.45  | 3.43962 | 1.55185 | 3.75566 | 5.40757 | 0     | 2.3003 1.81832  |
| SP – São Paulo; MA – Mairiporã; IG – Igaratá, RP – Rio Preto; CA – Caraguatatuba; BA – Balsamo; PI – Pindamonhangaba; MI – Miracatu; SD – standard deviation. |     |         |         |       |         |         |         |         |       |                 |

**Table S3.** Pairwise population fixation index  $F_{ST}$  based on mitochondrial SNPs for the sampled populations of *Haemagogus leucocelaenus*.

|                 | São Paulo | Mairiporã | Igaratá  | Rio Preto | Caraguatatuba | Balsamo  | Pindamonhangaba |
|-----------------|-----------|-----------|----------|-----------|---------------|----------|-----------------|
| São Paulo       | -         | -         | -        | -         | -             | -        | -               |
| Mairiporã       | 0.0201    | -         | -        | -         | -             | -        | -               |
| Igaratá         | 0.23701   | 0         | -        | -         | -             | -        | -               |
| Rio Preto       | 0.6422*   | 0.57456*  | 0.58807* | -         | -             | -        | -               |
| Caraguatatuba   | 0.327*    | 0.18962*  | 0.12272  | 0.42301*  | -             | -        | -               |
| Balsamo         | 0.74982*  | 0.67021*  | 0.62904* | 0.1099    | 0.46729*      | -        | -               |
| Pindamonhangaba | 0         | 0         | 0        | 0.5248*   | 0             | 0.54075* | -               |
| Miracatu        | 0         | 0         | 1        | 0.5311*   | 0.12608       | 0.68457* | 0               |

\* Significance level  $p < 0.05$ .

**Table S4.** Landscape metrics based on buffers with radii of 2,850 and 5,700 m around the collection locations.

| Buffer  | Municipality    | Loca<br>tion | Land-use class |         |                          |          |          |          |          |          |        |          |                         |         |          |         | Total area<br>(m <sup>2</sup> ) |
|---------|-----------------|--------------|----------------|---------|--------------------------|----------|----------|----------|----------|----------|--------|----------|-------------------------|---------|----------|---------|---------------------------------|
|         |                 |              | Water          |         | Agricultural land<br>use |          | Urban    |          | Forest   |          |        |          | Non-forest<br>formation |         | Forestry |         |                                 |
|         |                 |              | CA             | PLAND   | CA                       | PLAND    | CA       | PLAND    | CA       | PLAND    | TE     | ED       | CA                      | PLAND   | CA       | PLAND   |                                 |
| 2,850 m | Balsamo         | i            | 1.8            | 0.0705  | 2033.37                  | 79.6734  | 0        | 0        | 352.08   | 13.7955  | 65880  | 25.8137  | 0                       | 0       | 164.88   | 6.4605  | 2552.13                         |
|         | Caraguatatuba   | ii           | 0.36           | 0.0141  | 522.45                   | 20.46425 | 0        | 0        | 2030.175 | 79.52165 | 67230  | 26.33385 | 0                       | 0       | 0        | 0       | 2552.985                        |
|         |                 | iii          | 11.34          | 0.4987  | 306.9                    | 13.4975  | 859.32   | 37.7929  | 1086.3   | 47.7755  | 103140 | 45.361   | 0                       | 0       | 9.9      | 0.4354  | 2273.76                         |
|         | Igaratá         | iv           | 1022.94        | 40.079  | 1153.71                  | 45.2026  | 0        | 0        | 346.86   | 13.59    | 94140  | 36.8842  | 0                       | 0       | 28.8     | 1.1284  | 2552.31                         |
|         | Mairiporã       | v            | 2.7            | 0.1058  | 136.53                   | 5.3491   | 353.88   | 13.8646  | 2059.29  | 80.6805  | 123960 | 48.5661  | 0                       | 0       | 0        | 0       | 2552.4                          |
|         | Miracatu        | vi           | 174.87         | 6.8507  | 29.52                    | 1.1565   | 0        | 0        | 2348.19  | 91.9928  | 40500  | 15.8663  | 0                       | 0       | 0        | 0       | 2552.58                         |
|         | São Paulo       | vii          | 4.905          | 0.19215 | 140.04                   | 5.48575  | 1146.735 | 44.92045 | 1252.08  | 49.0473  | 108570 | 42.5297  | 0                       | 0       | 9.045    | 0.35435 | 2552.805                        |
|         |                 | viii         | 4.995          | 0.1957  | 165.87                   | 6.4978   | 838.035  | 32.8292  | 1534.995 | 60.1319  | 111240 | 43.5771  | 0                       | 0       | 8.82     | 0.34555 | 2552.715                        |
|         | Rio Preto       | ix           | 4.365          | 0.171   | 2372.895                 | 92.9492  | 36.945   | 1.44715  | 111.555  | 4.36975  | 28590  | 11.19905 | 0                       | 0       | 27.135   | 1.0629  | 2552.895                        |
|         |                 | x            | 3.87           | 0.1516  | 2371.725                 | 92.90665 | 41.625   | 1.63055  | 108.855  | 4.26415  | 28020  | 10.97615 | 0                       | 0       | 26.73    | 1.0471  | 2552.805                        |
|         | Pindamonhangaba | xi           | 0.27           | 0.0106  | 822.15                   | 32.1995  | 0        | 0        | 1684.53  | 65.9746  | 161730 | 63.3416  | 0                       | 0       | 46.35    | 1.8153  | 2553.3                          |
| 5,700 m | Balsamo         | i            | 16.65          | 0.1632  | 7851.15                  | 76.9336  | 0        | 0        | 1276.29  | 12.5064  | 267750 | 26.2369  | 0                       | 0       | 1061.01  | 10.3969 | 10205.1                         |
|         | Caraguatatuba   | ii           | 3.24           | 0.03175 | 2603.25                  | 25.5045  | 0        | 0        | 7600.545 | 74.4638  | 209895 | 20.56375 | 0                       | 0       | 0        | 0       | 10207.035                       |
|         |                 | iii          | 21.78          | 0.265   | 1255.59                  | 15.276   | 1546.11  | 18.8106  | 5371.56  | 65.3527  | 257400 | 31.3164  | 0                       | 0       | 24.3     | 0.2956  | 8219.34                         |
|         | Igaratá         | iv           | 2605.14        | 25.5267 | 5523.84                  | 54.1258  | 53.82    | 0.5274   | 1578.6   | 15.4681  | 361650 | 35.4366  | 0                       | 0       | 444.15   | 4.352   | 10205.55                        |
|         | Mairiporã       | v            | 32.94          | 0.3227  | 1217.43                  | 11.9282  | 2389.77  | 23.4145  | 6562.17  | 64.2949  | 617550 | 60.5064  | 0.36                    | 0.0035  | 3.69     | 0.0362  | 10206.36                        |
|         | Miracatu        | vi           | 288.36         | 2.8254  | 82.35                    | 0.8069   | 0        | 0        | 9835.38  | 96.3678  | 91140  | 8.93     | 0                       | 0       | 0        | 0       | 10206.09                        |
|         | São Paulo       | vii          | 9.585          | 0.0939  | 455.58                   | 4.4636   | 5899.905 | 57.8046  | 3832.515 | 37.54925 | 295275 | 28.92975 | 0                       | 0       | 9.045    | 0.08865 | 10206.63                        |
|         |                 | viii         | 13.635         | 0.1336  | 489.51                   | 4.7961   | 5406.615 | 52.97275 | 4287.69  | 42.0098  | 347880 | 34.08445 | 0.135                   | 0.00135 | 8.82     | 0.08645 | 10206.405                       |
|         | Rio Preto       | ix           | 21.735         | 0.21295 | 8666.595                 | 84.9088  | 831.69   | 8.1483   | 595.17   | 5.83105  | 165270 | 16.1919  | 0                       | 0       | 91.755   | 0.89895 | 10206.945                       |
|         |                 | x            | 18             | 0.17635 | 8656.56                  | 84.812   | 850.95   | 8.33715  | 585.945  | 5.74075  | 163425 | 16.01145 | 0                       | 0       | 91.665   | 0.8981  | 10203.12                        |
|         | Pindamonhangaba | xi           | 20.7           | 0.2028  | 5109.57                  | 50.0538  | 0        | 0        | 4859.64  | 47.6054  | 601260 | 58.8999  | 0                       | 0       | 218.25   | 2.138   | 10208.16                        |

CA –Total area; PLAND – Percentage of landscape occupied by land-use class; TE – Total forest edge (linear meters); ED –Forest edge density (m/ha); i - Sítio Madalena; ii - Sítio João; iii - Sítio Paulo; iv - Pontal das Garças Gated Community; v - Pinheirinho trail; vi - Legado das Águas Ecological Reserve; vii - Bica Trail; viii - Administrative Sector; ix - Macacos forest (fragment south of dirt road); x - Macacos Forest (fragment north of dirt road); and xi - Trabiju Municipal Park.



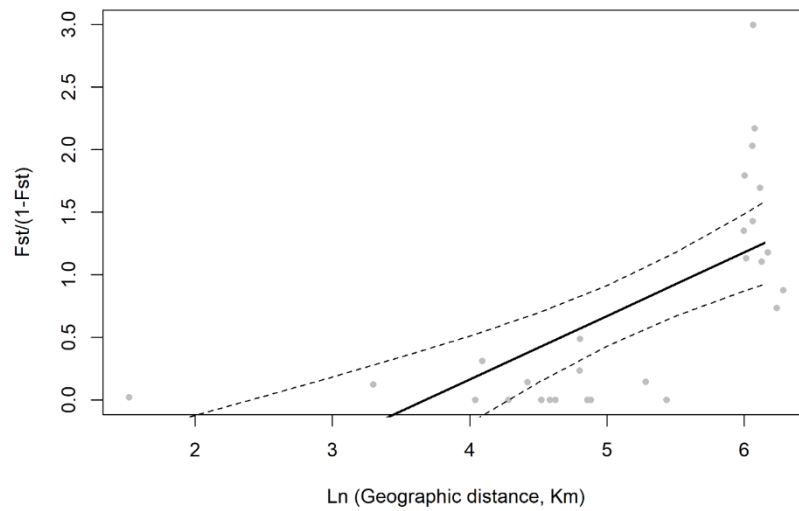

**Figure S2.** Linear correlation on a natural log scale between genetic distance ( $F_{ST} / (1 - F_{ST})$ ) and geographic distance separating the *Hg. leucocelaenus* populations studied. Gray points represent the distribution of the data, and the black line represents the model fit, while the dashed lines represent the 95% confidence interval.

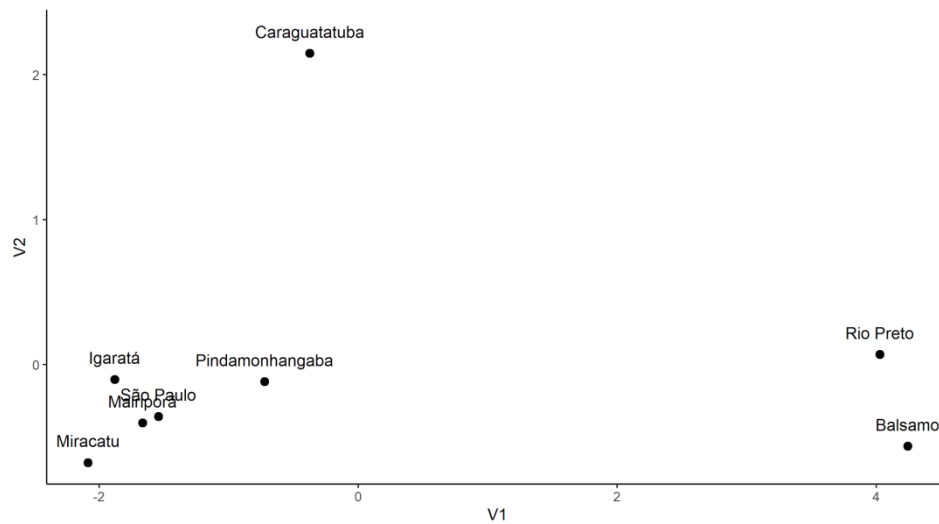

**Figure S3.** Multidimensional scaling analysis (MDS) of the Euclidian distances between the allele frequencies of the populations for the mitochondrial SNPs.

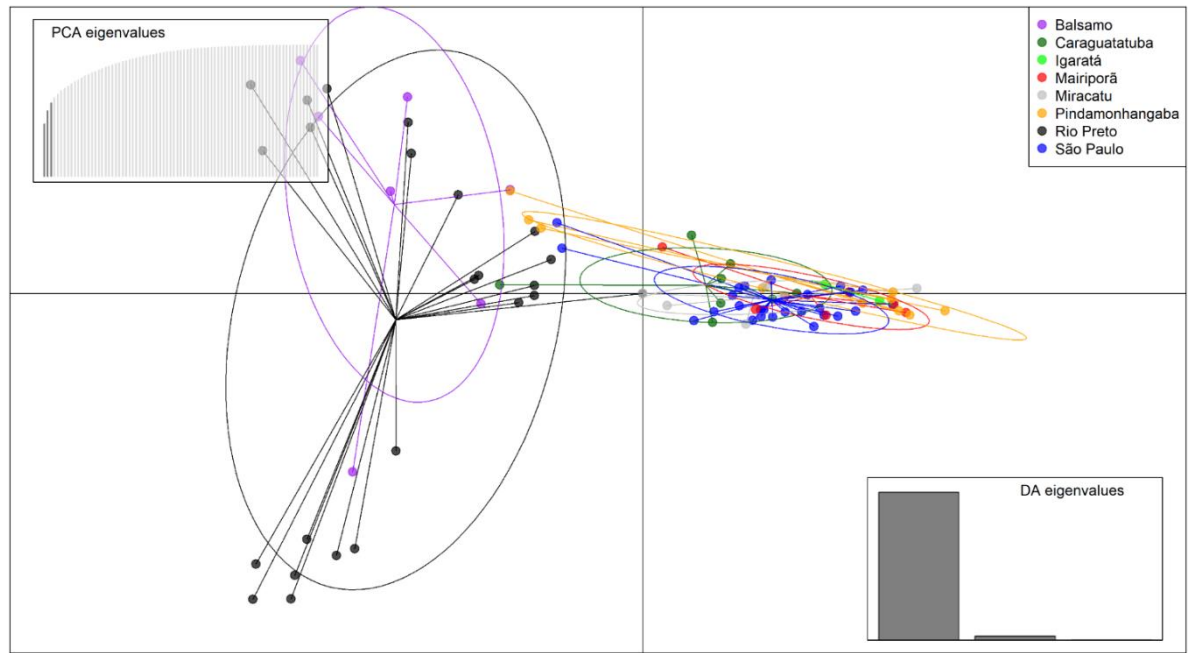

**Figure S4.** Discriminant analysis of principal components (DAPC) of individuals sampled in eight municipalities.



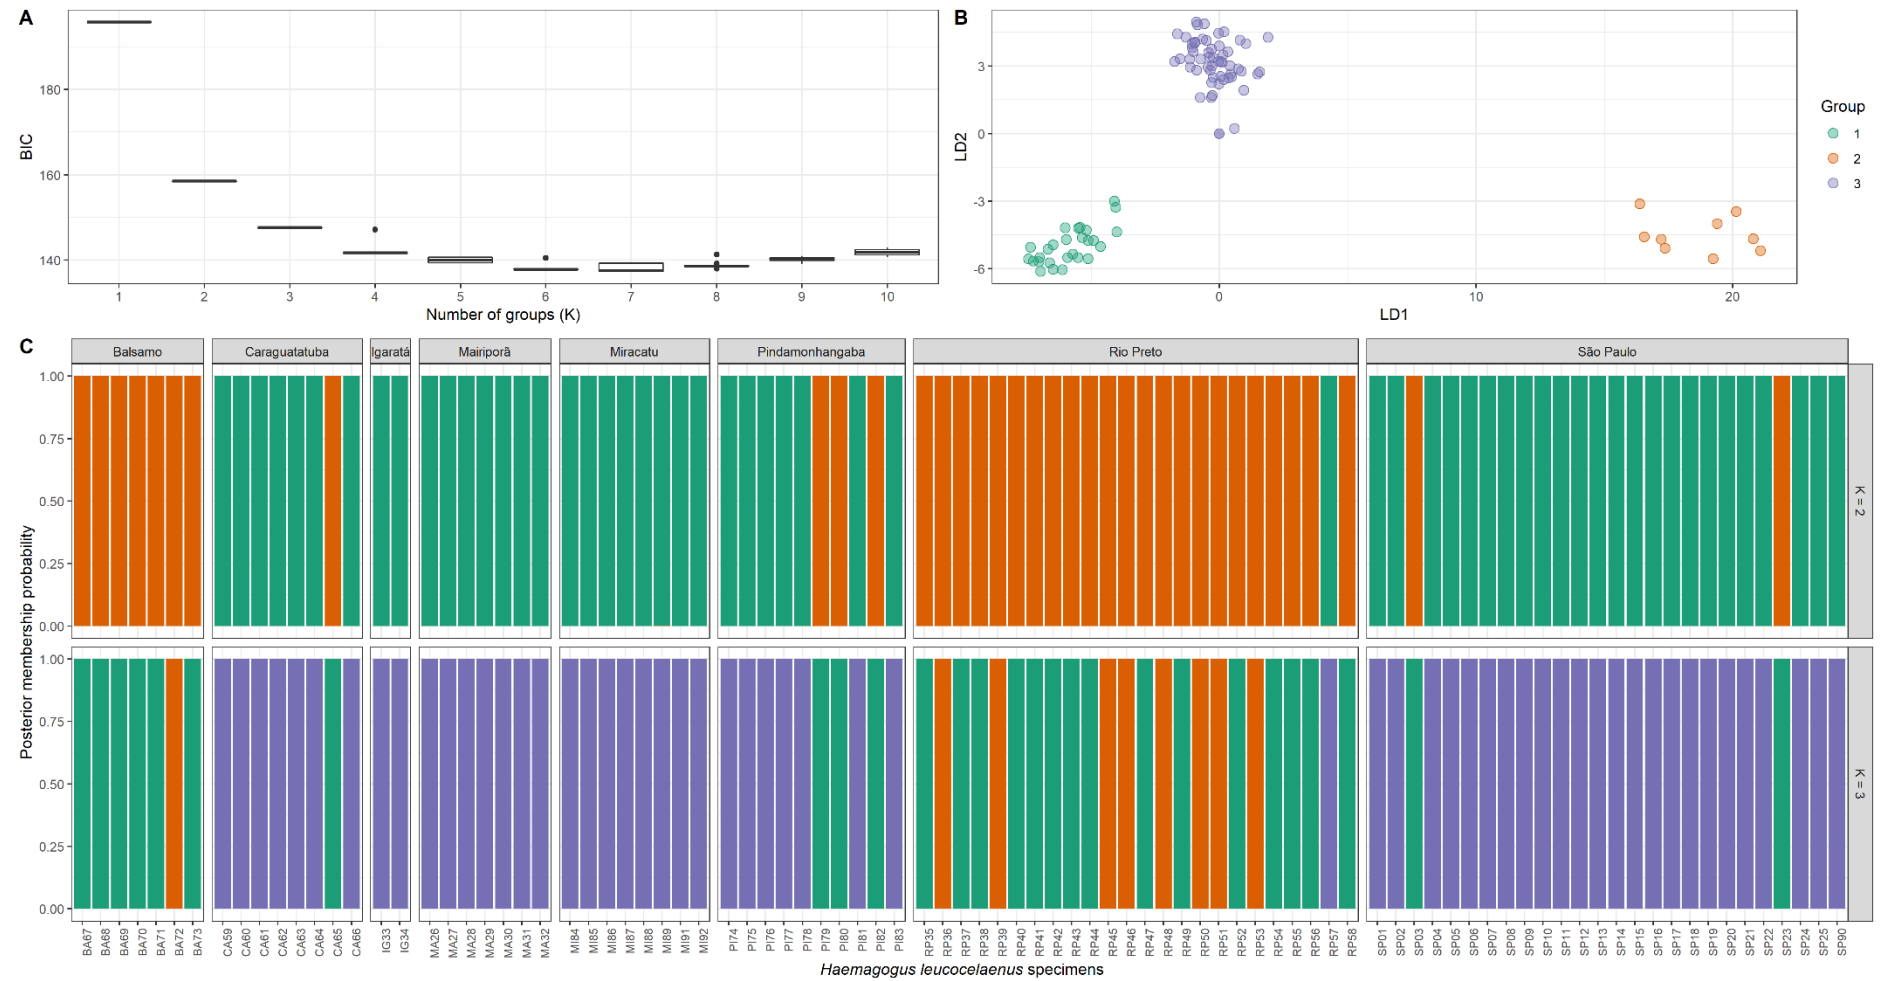

**Figure S5.** Multipanel figure showing population structure of sampled *Hg. leucocelaenus* specimens. A and B: number of genetic clusters (K); C: subdivision of specimens for K=2 and K=3. Each of the 92 specimens of the 8 populations sampled is represented by a vertical line.

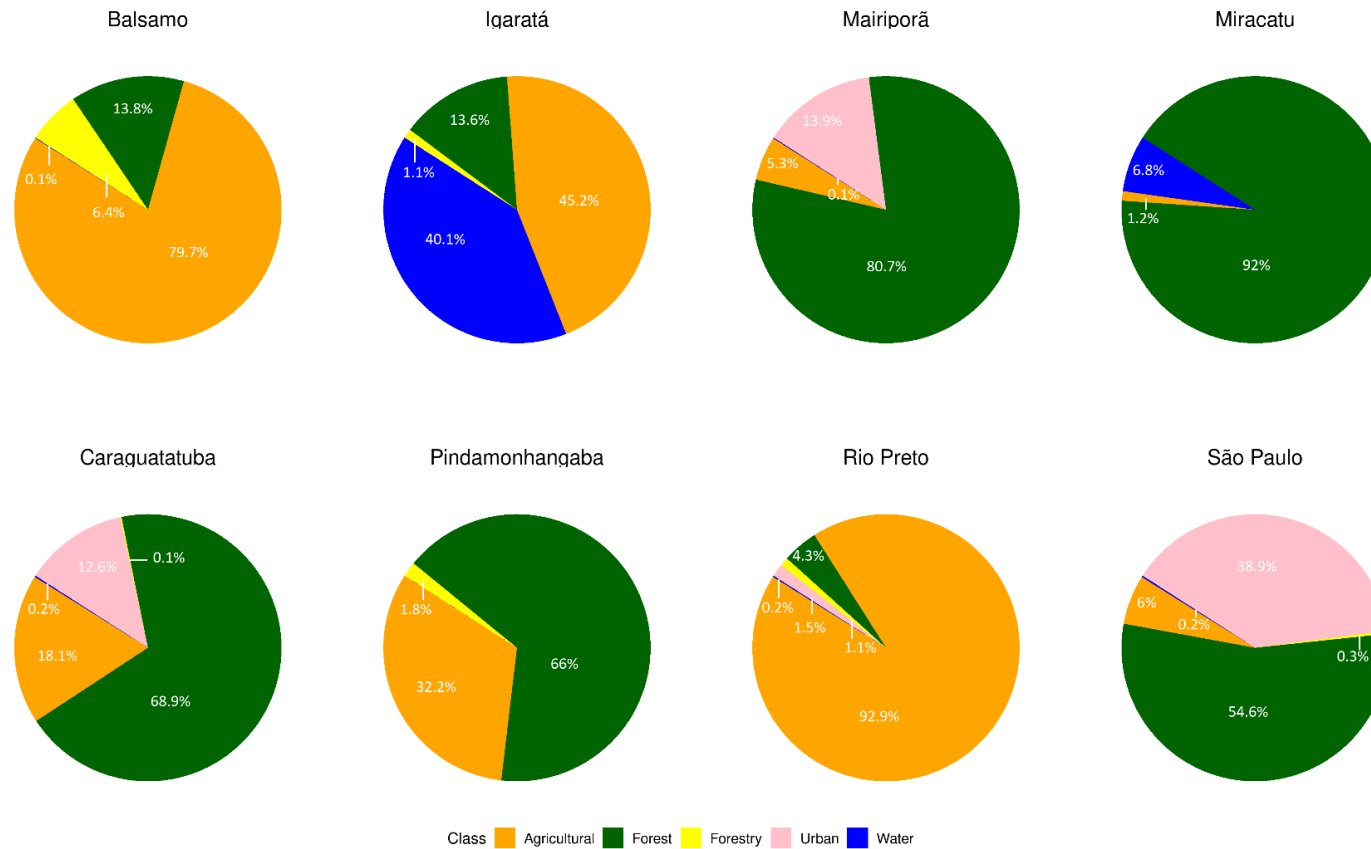

**Figure S6.** Landscape configuration based on 2,850 m buffers around the collection points - half the maximum species dispersal distance for *Hg. leucocelaenus* [64]. This is in accordance with the dispersal radius expected by Jackson & Fahrig [63] for a given species.

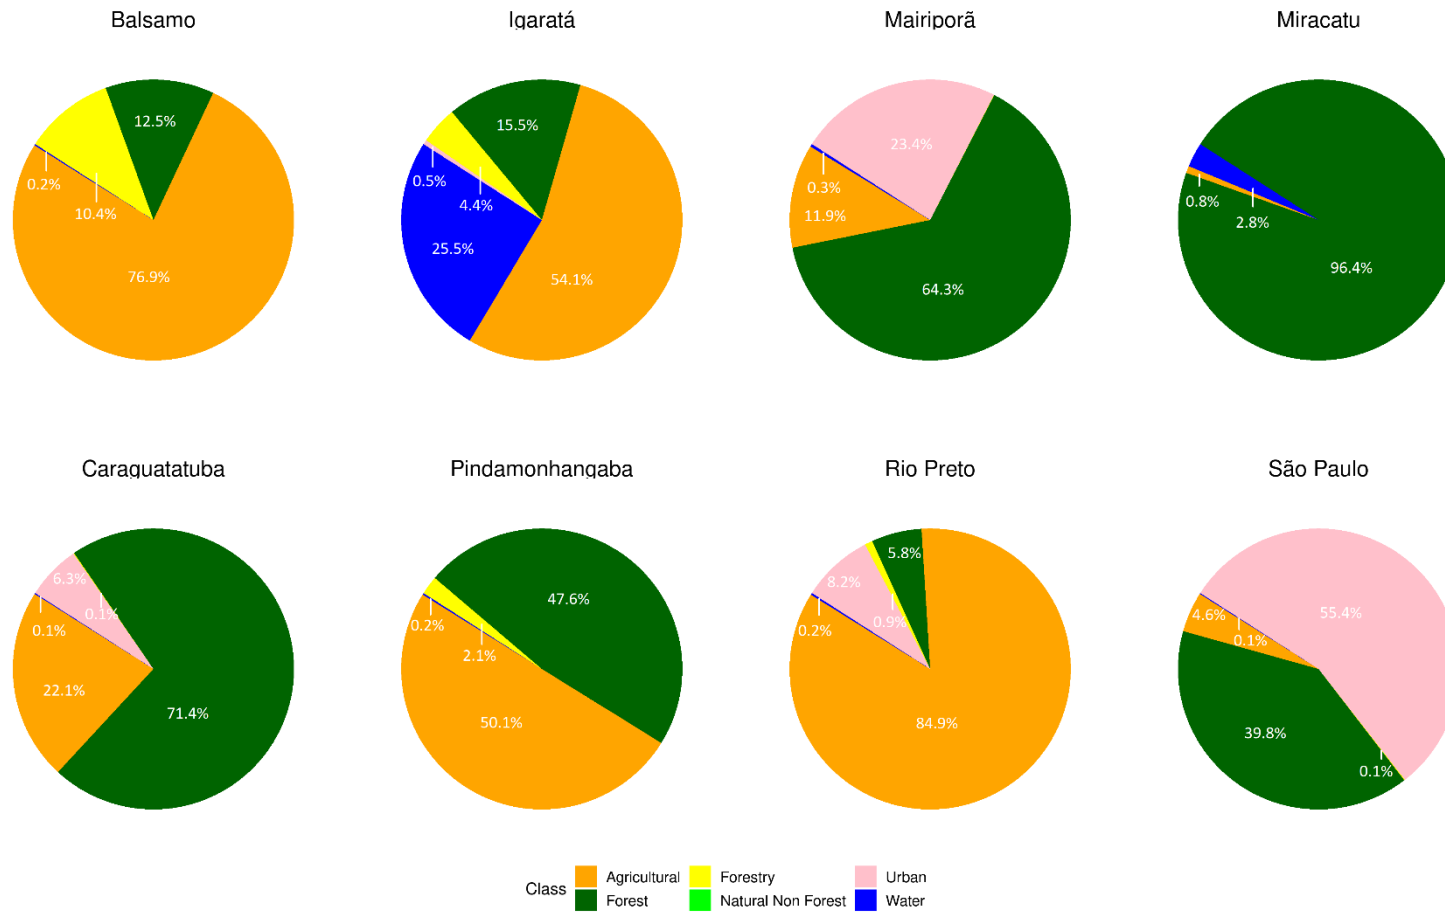

**Figure S7.** Landscape configuration based on 5,700 m buffers - the maximum species dispersal distance for *Hg. leucocelaenus* [64].
